# Supplementary material
Source: PubMed Central journal article supplement (PMC9838092)
Supplement: fig_s1_ddac182.pdf [file fig_s1_ddac182.pdf]

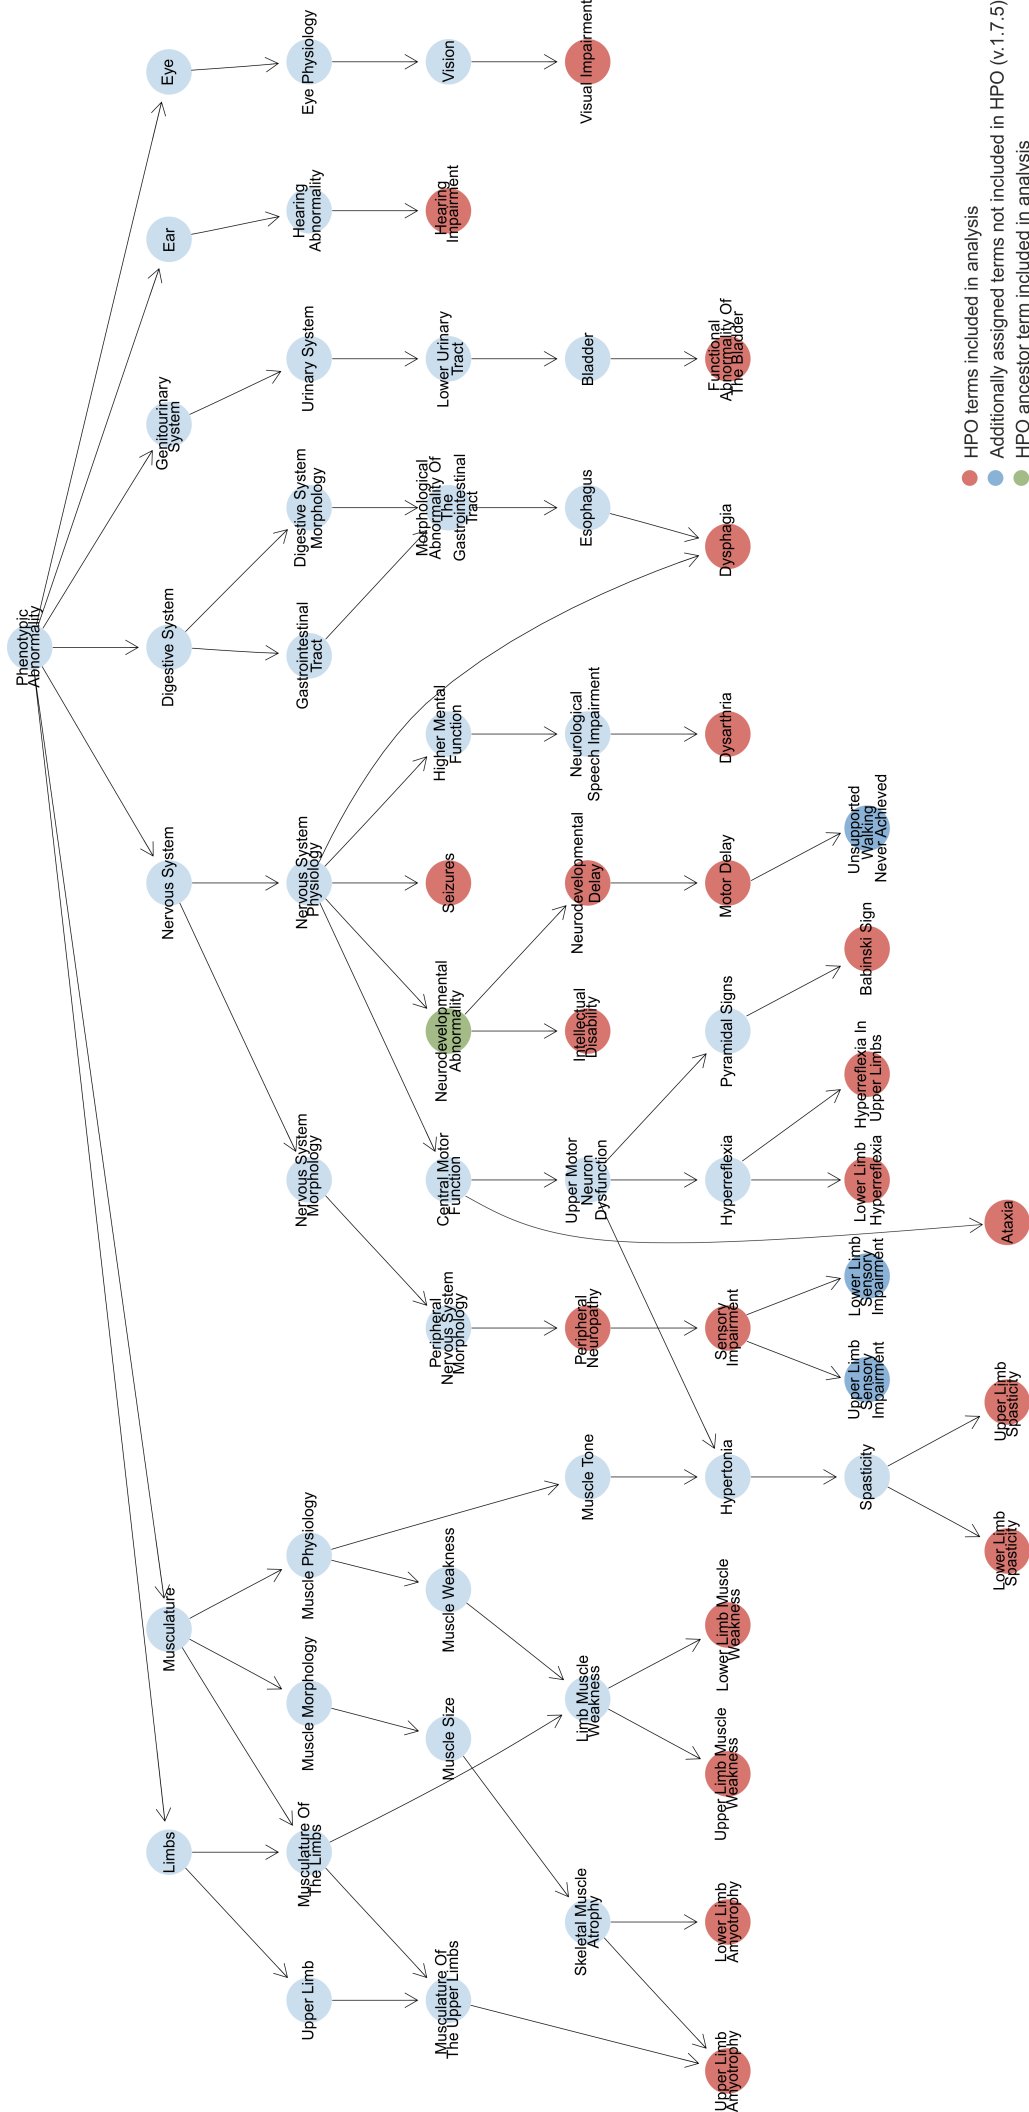

- HPO terms included in analysis
- Additionally assigned terms not included in HPO (v.1.7.5)
- HPO ancestor term included in analysis
