# Supplementary material
Source: PubMed Central journal article supplement (PMC9838092)
Supplement: fig_s4_ddac182.pdf [file fig_s4_ddac182.pdf]

**A**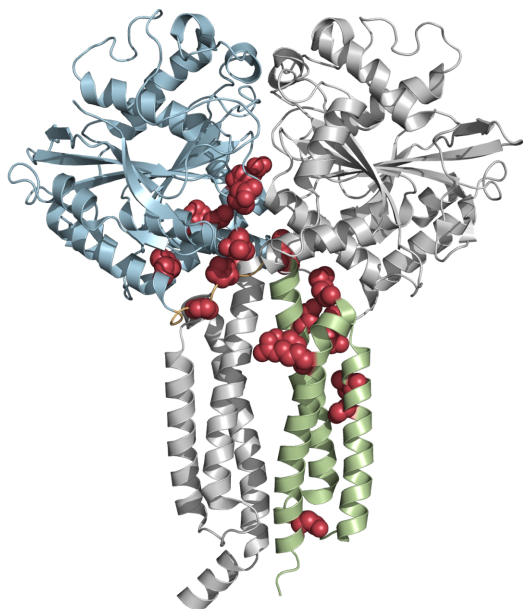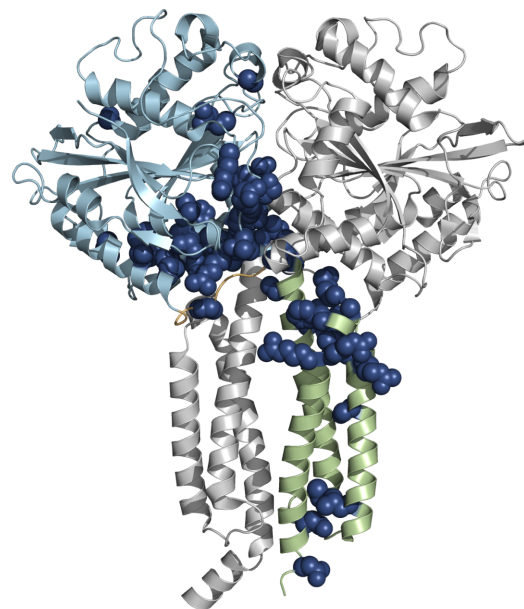**B**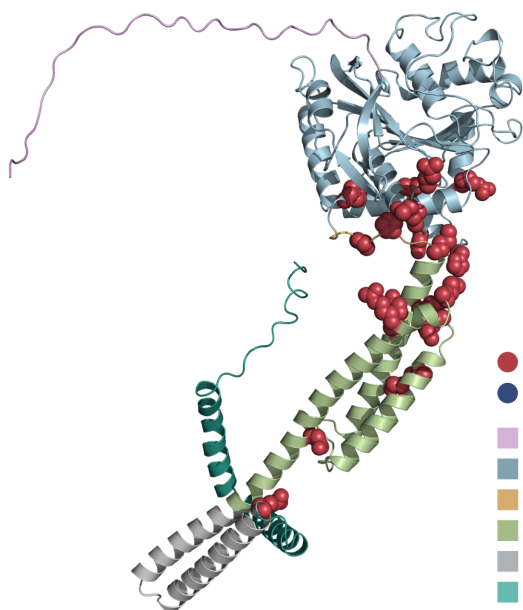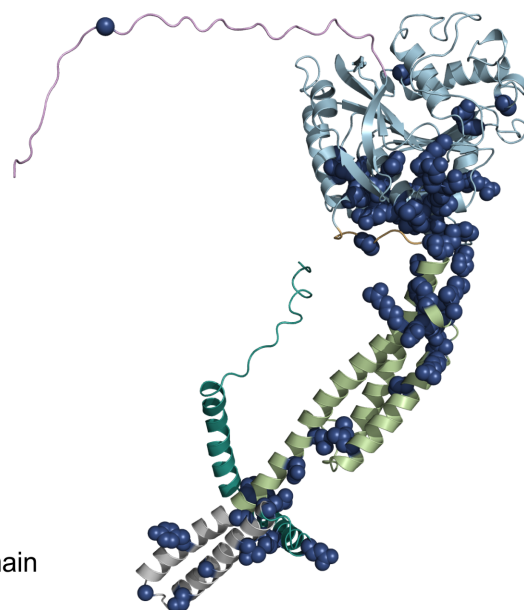

- de novo
- non-de novo
- Hypervariable region
- G domain
- Linker
- M domain
- Transmembrane domain
- C-terminal helix
