# Supplementary material
Source: PubMed Central journal article supplement (PMC9838092)

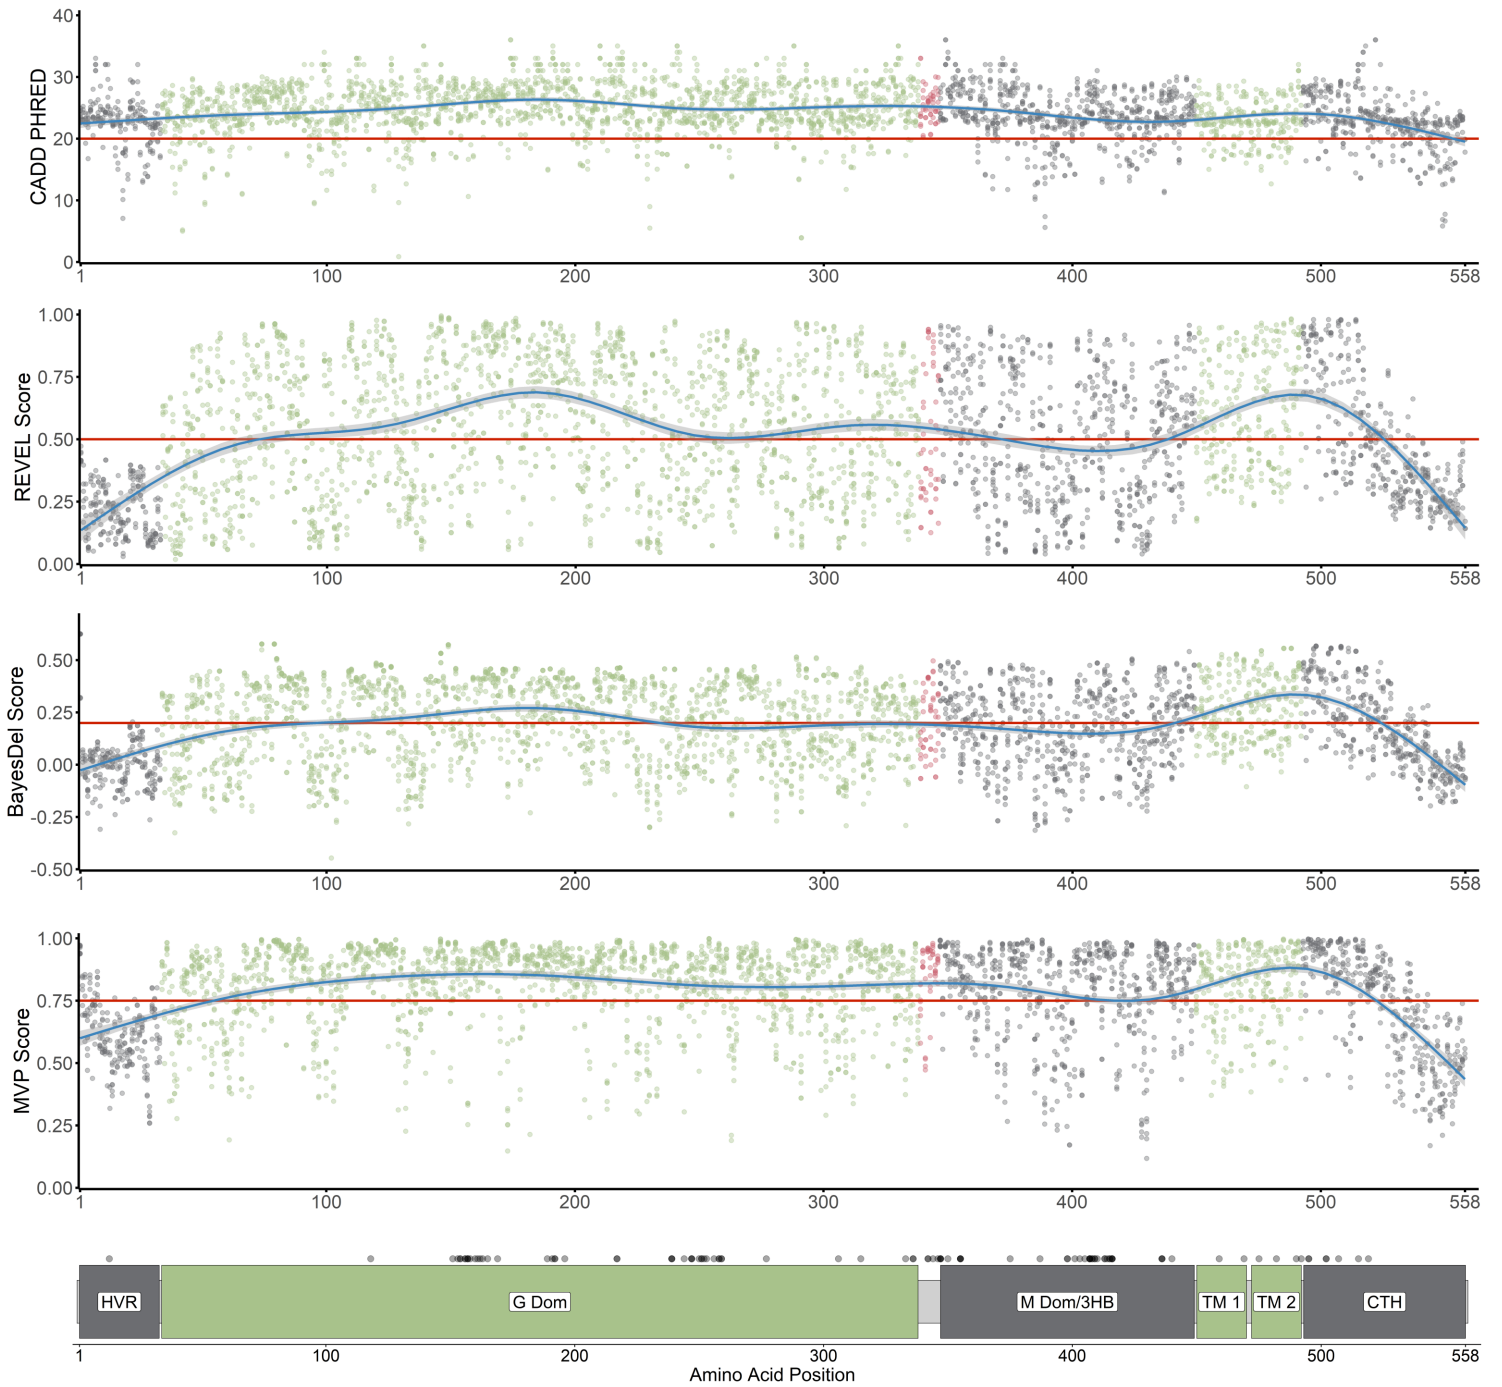

Supplement: fig_s2_ddac182.pdf [file fig_s2_ddac182.pdf]

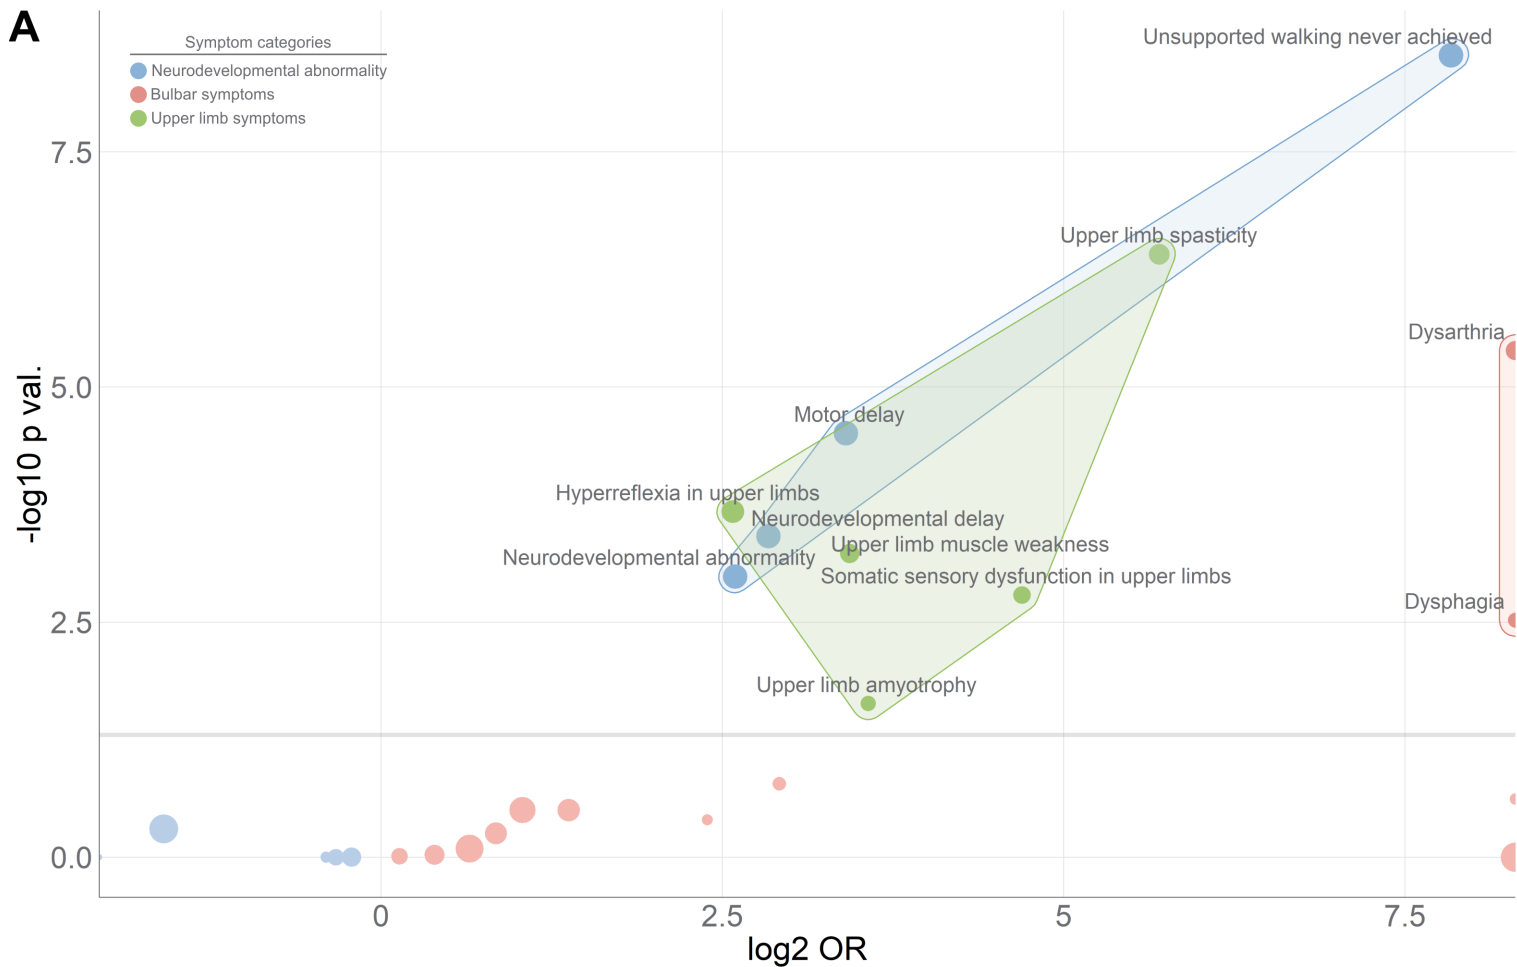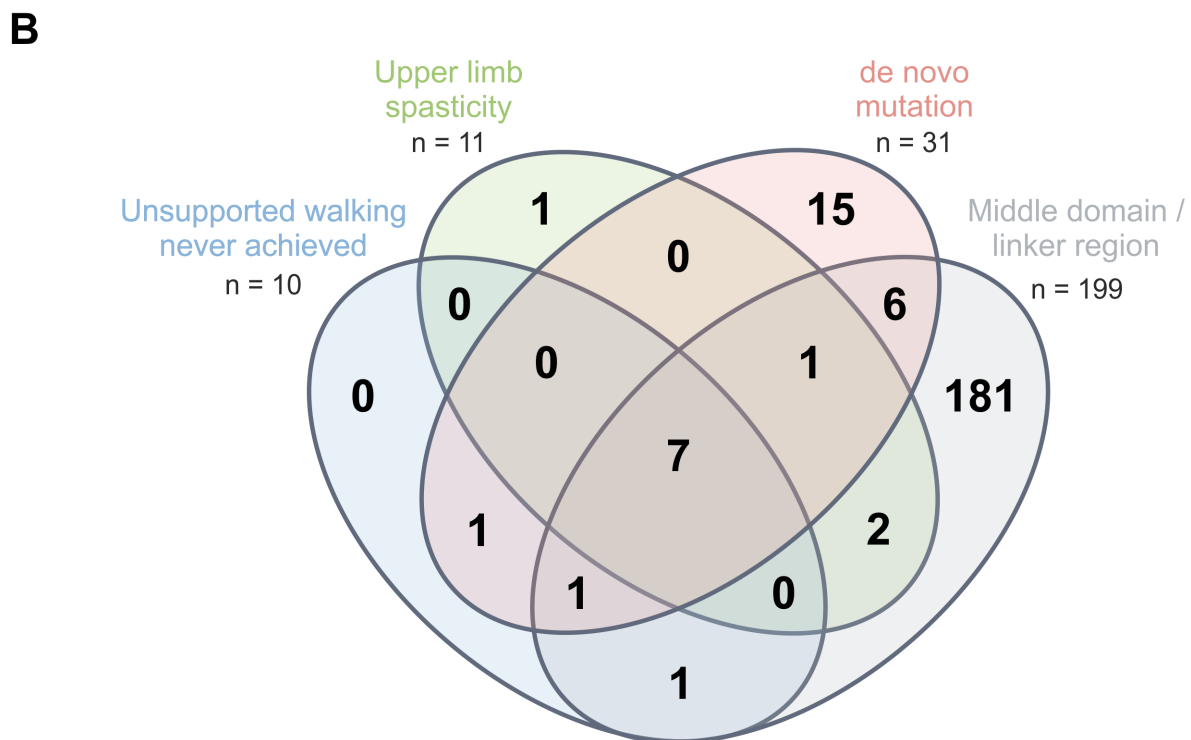

Supplement: fig_s3_ddac182.pdf [file fig_s3_ddac182.pdf]

**A**

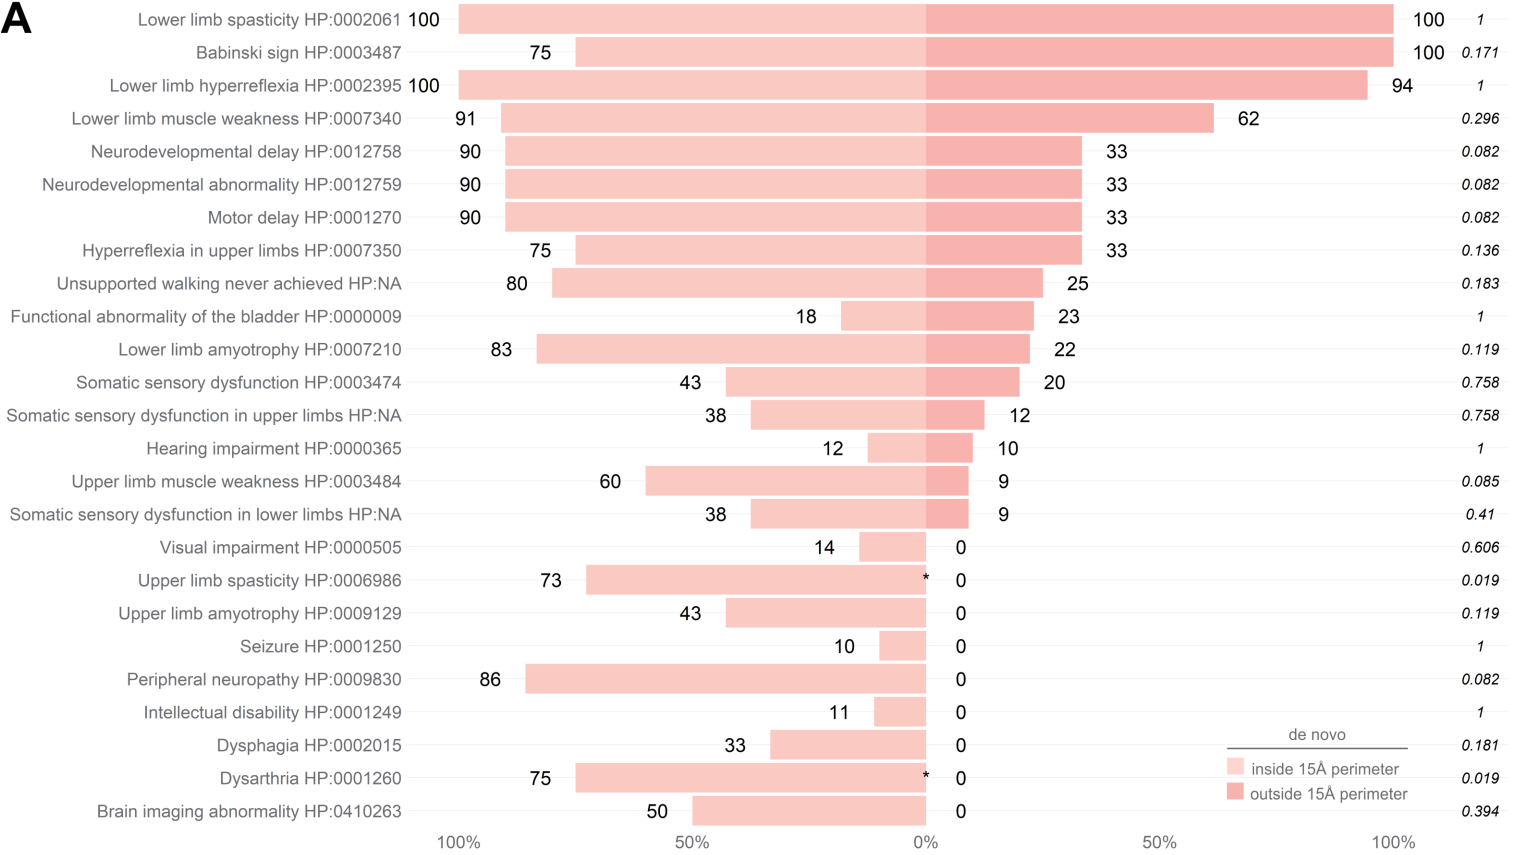

**B**

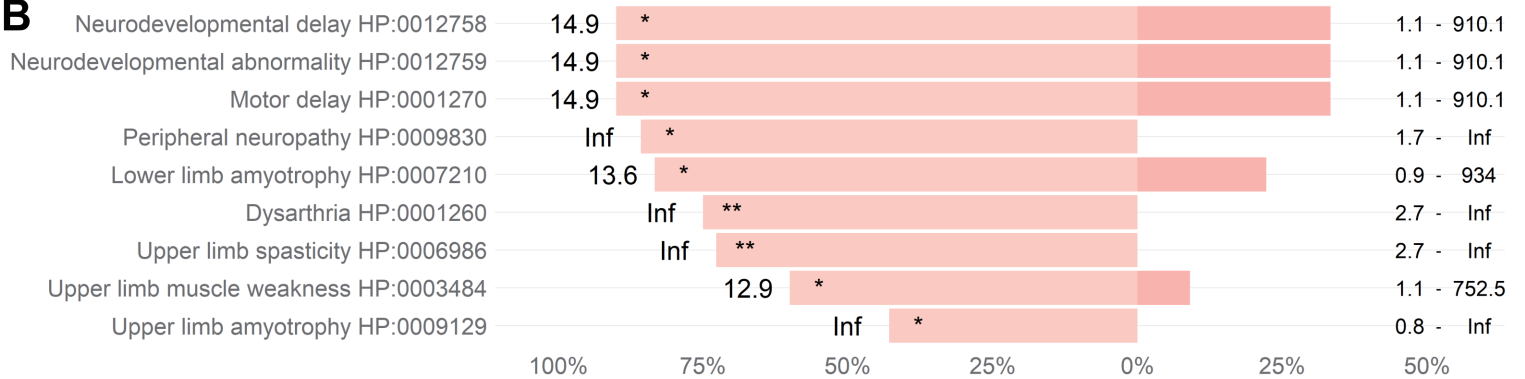

Supplement: fig_s5_ddac182.pdf [file fig_s5_ddac182.pdf]

**A**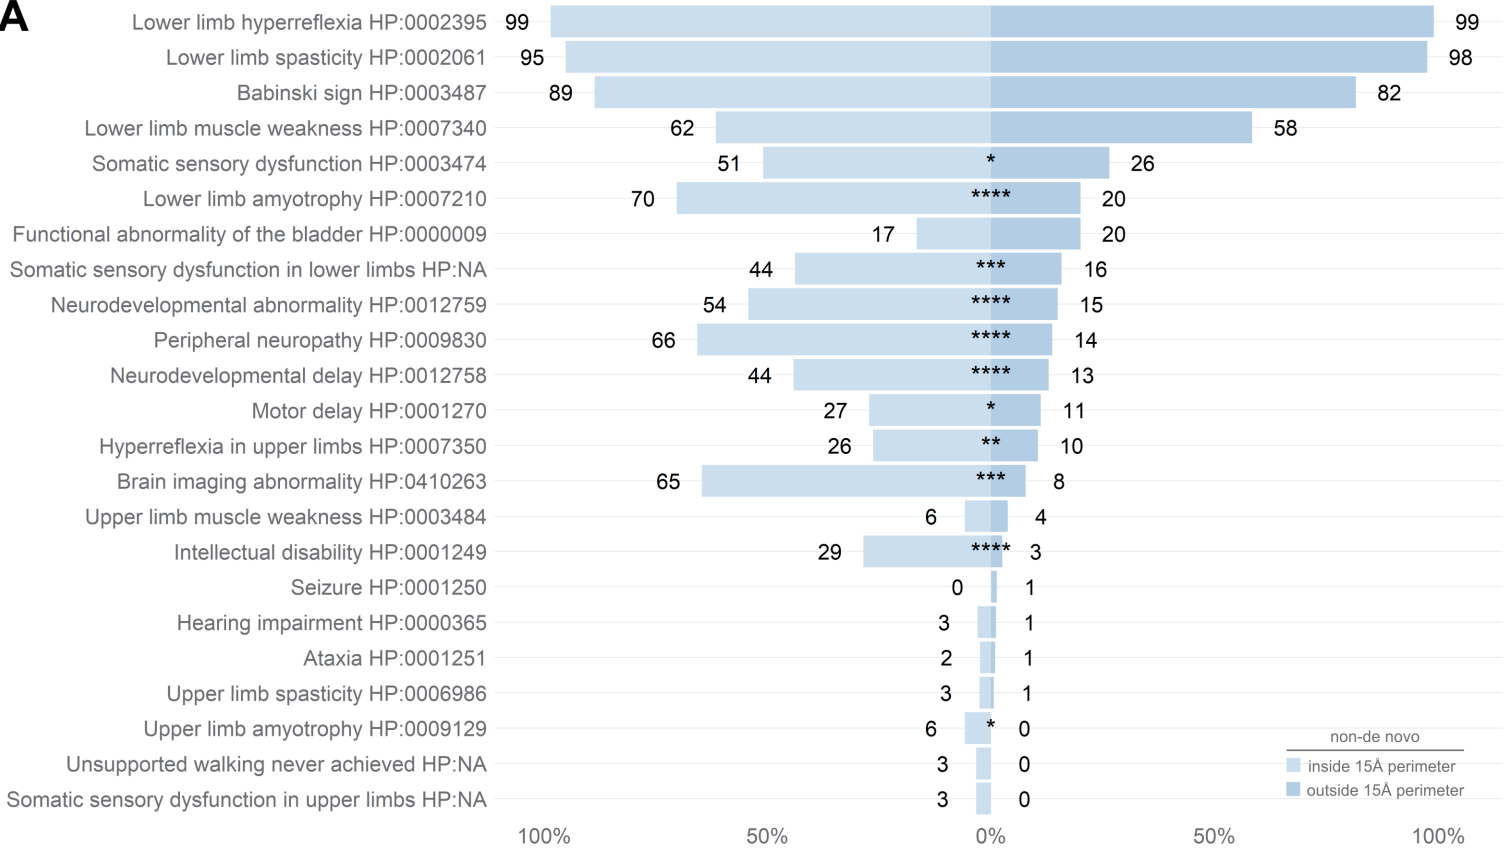**B**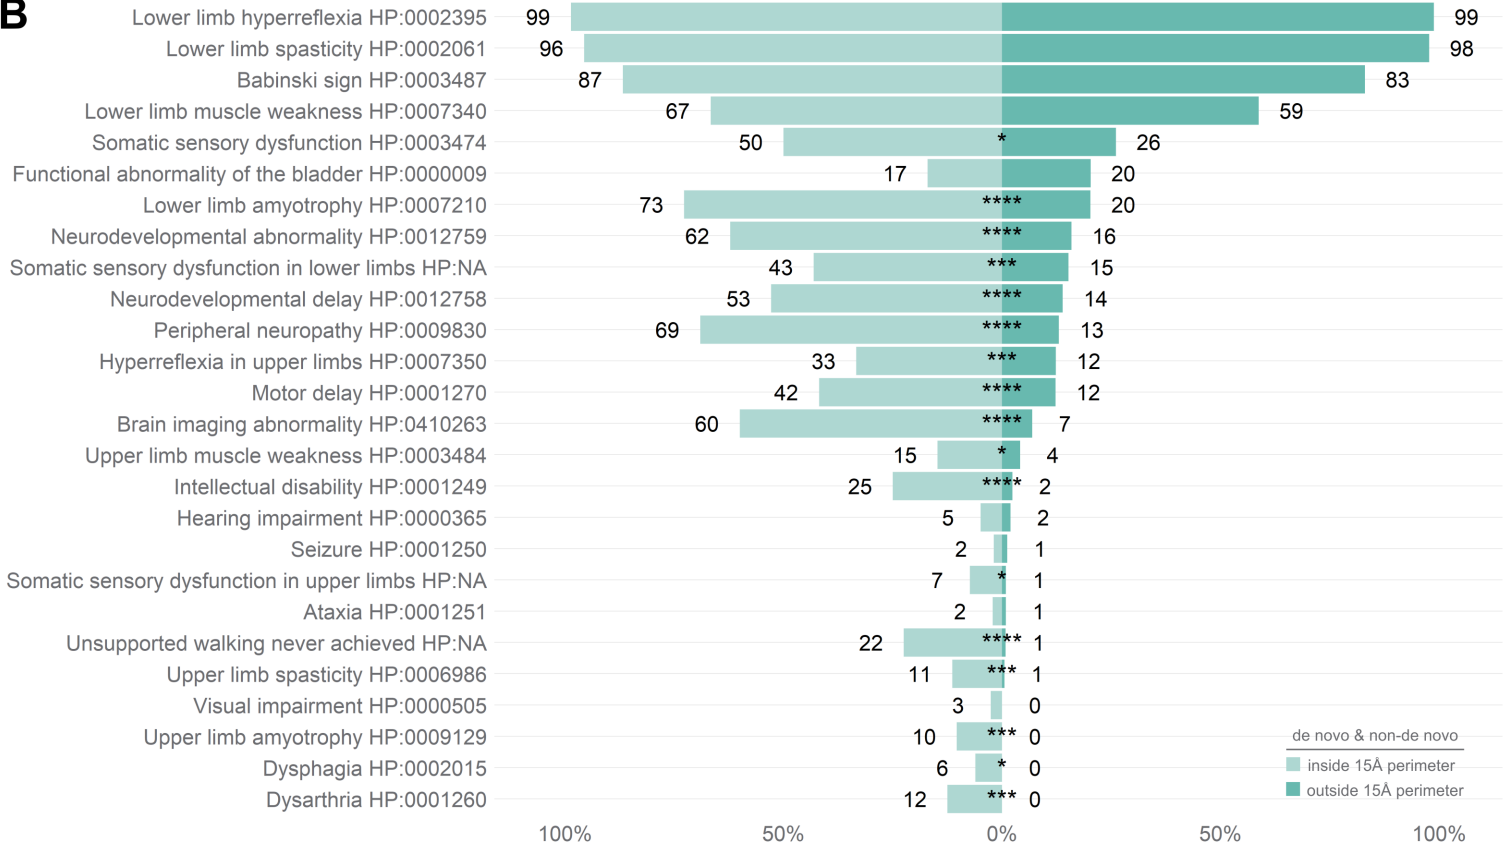

Supplement: fig_s6_ddac182.pdf [file fig_s6_ddac182.pdf]
